# Supplementary material for: Label-Free Detection of T4 Polynucleotide Kinase Activity and Inhibition via Malachite Green Aptamer Generated from Ligation-Triggered Transcription
Source: MDPI journal article supplement (doi:10.3390/bios13040449), 2023-03-31
Supplement: s1 [file s1]

Supplementary Material

# Label-Free Detection of T4 Polynucleotide Kinase Activity and Inhibition via Malachite Green Aptamer Generated from Ligation-Triggered Transcription

Jingyi Si <sup>1</sup>, Wei Zhou <sup>2</sup>, Ying Fang <sup>1</sup>, Da Zhou <sup>1</sup>, Yifan Gao <sup>1</sup>, Qunyan Yao <sup>1</sup>, Xizhong Shen <sup>1</sup> and Changfeng Zhu <sup>1,\*</sup>

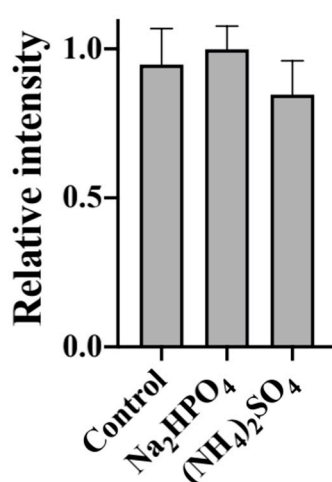

**Figure S1.** Inhibition effects of Na<sub>2</sub>HPO<sub>4</sub> and (NH<sub>4</sub>)<sub>2</sub>SO<sub>4</sub> on T4 DNA ligase and T7 RNA polymerase.

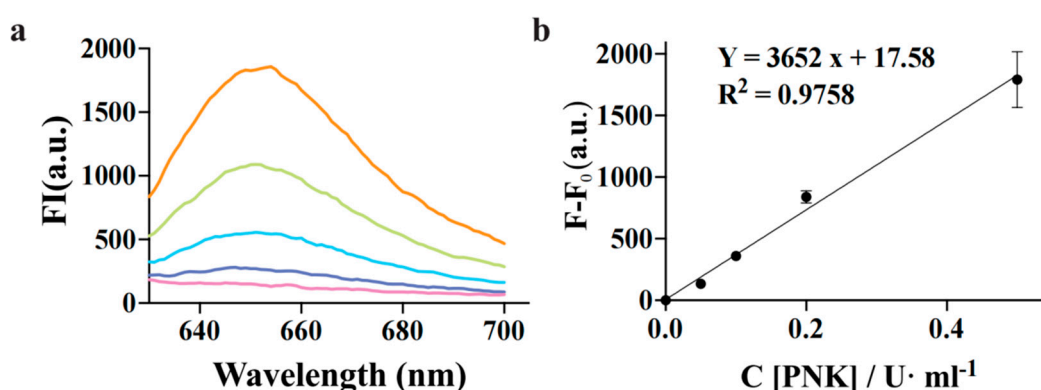

**Figure S2.** (a) Fluorescence emission spectrum of the assay upon addition of different units of T4 PNK in diluted cell lysate (from bottom to top): 0, 0.05, 0.1, 0.2, 0.5 U/mL. (b) Calibration curve for T4 PNK detection in diluted cell lysate. The error bars represent the standard deviation (SD) across three repetitive experiments over the blank response.
